# Supplementary material
Source: Springer Nature journal article supplement (https://www.springermedizin.de/resource/supplementary/13054_2012_2088_MOESM1_ESM.pdf/9711936)

**n=1474**  
Adult patients admitted to general ICUs of two university-teaching hospitals of Rome (Policlinico Umberto I° and Policlinico Gemelli) between April 2009 and June 2011

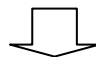

**n=279**  
Pts without AKI considered eligible for the study.

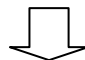

**CMS n=90**

**CMS/NAs n=57**

**NAs n=132**

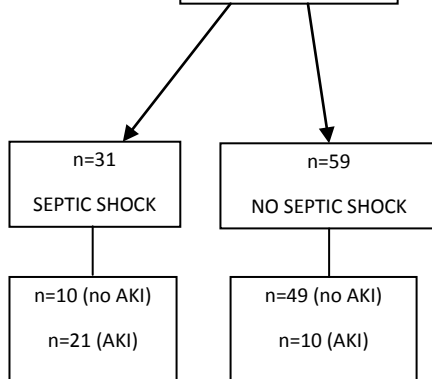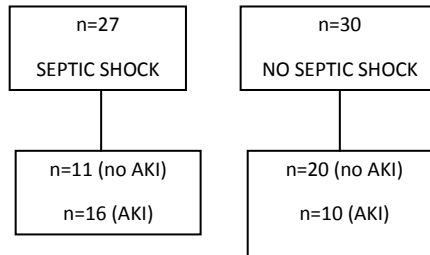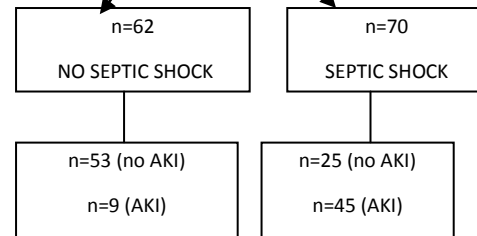

Supplement: MOESM1 [file 9711936]
